# Supplementary material for: Less reactive dipoles of diazodicarbonyl compounds in reaction with cycloaliphatic thioketones – First evidence for the 1,3-oxathiole–thiocarbonyl ylide interconversion
Source: publisher site journal article supplement (doi:10.3762/bjoc.9.309), 2013-12-02
Supplement: Additional file 2 [file 1860-5397-9-309-S2.pdf]

## Supporting Information

for

### **Less reactive dipoles of diazodicarbonyl compounds in reaction with cycloaliphatic thioketones – First evidence for the 1,3-oxathiole–thiocarbonyl ylide interconversion**

Valerij A. Nikolaev\*<sup>1</sup>, Alexey V. Ivanov<sup>1</sup>, Ludmila L. Rodina<sup>1</sup> and Grzegorz Mlostoń\*<sup>2</sup>

Address: <sup>1</sup>Saint-Petersburg State University, 198504, Saint Petersburg, University prosp., 26, Russia and <sup>2</sup>University of Łódź, Faculty of Chemistry, Tamka 12, 91-403, Łódź, Poland

E-mail: Grzegorz Mlostoń - [gmloston@uni.lodz.pl](mailto:gmloston@uni.lodz.pl) and Valerij A. Nikolaev - [vnikola@VN6646.spb.edu](mailto:vnikola@VN6646.spb.edu)

\*Corresponding author

Details of computational studies: Cartesian coordinates, computed geometries of compounds, transition states and computed total energies.

**Table S1:** Details of computational results: Cartesian coordinates and computed total energies computed at the DFT PBE1PBE/6-31G(d) level.

Diazoacetylacetone **2a**

|   |           |           |           |
|---|-----------|-----------|-----------|
| C | 0.000008  | 0.314543  | 2.549146  |
| H | -0.884893 | 0.961704  | 2.572851  |
| H | 0.884911  | 0.961703  | 2.572826  |
| H | 0.000020  | -0.324177 | 3.433379  |
| C | -0.000011 | -0.574656 | 1.323749  |
| C | -0.000007 | 0.107378  | 0.000000  |
| C | -0.000011 | -0.574656 | -1.323749 |
| C | 0.000008  | 0.314543  | -2.549146 |
| H | 0.884911  | 0.961703  | -2.572826 |
| H | 0.000020  | -0.324177 | -3.433379 |
| H | -0.884893 | 0.961704  | -2.572851 |
| O | -0.000011 | -1.781228 | 1.402327  |
| O | -0.000011 | -1.781228 | -1.402327 |
| N | 0.000007  | 1.417212  | 0.000000  |
| N | 0.000019  | 2.551113  | 0.000000  |

-453.455350 A.U.

2,2,4,4-tetramethyl-3-thioxocyclobutane-1-one **1a**

|   |           |           |           |
|---|-----------|-----------|-----------|
| C | 0.000005  | 0.748165  | -0.000099 |
| C | -1.119758 | -0.292112 | -0.000012 |
| C | 1.119754  | -0.292126 | -0.000019 |
| C | -0.000009 | -1.351126 | -0.000004 |
| C | -1.980834 | -0.285391 | 1.262782  |
| H | -1.373159 | -0.301141 | 2.173244  |
| H | -2.599351 | 0.618001  | 1.281175  |
| H | -2.632408 | -1.165199 | 1.270007  |
| C | -1.980961 | -0.285444 | -1.262717 |
| H | -1.373380 | -0.301233 | -2.173241 |
| H | -2.632533 | -1.165255 | -1.269832 |
| H | -2.599486 | 0.617943  | -1.281092 |
| C | 1.980888  | -0.285408 | 1.262731  |
| H | 2.632450  | -1.165226 | 1.269935  |
| H | 2.599423  | 0.617974  | 1.281088  |
| H | 1.373256  | -0.301139 | 2.173221  |

|   |           |           |           |
|---|-----------|-----------|-----------|
| C | 1.980899  | -0.285477 | -1.262768 |
| H | 2.599428  | 0.617907  | -1.281179 |
| H | 2.632463  | -1.165293 | -1.269905 |
| H | 1.373276  | -0.301270 | -2.173263 |
| O | -0.000017 | -2.551544 | -0.000291 |
| S | 0.000015  | 2.361237  | 0.000176  |

-784.702888 A.U.

thiadiazoline **10a**

|   |           |           |           |
|---|-----------|-----------|-----------|
| S | 0.461915  | -0.336222 | 1.191451  |
| C | 1.686044  | -0.107036 | -0.145589 |
| C | 2.858927  | -1.083578 | -0.011502 |
| O | 3.252029  | -1.397839 | 1.088993  |
| C | 3.489151  | -1.567713 | -1.286419 |
| H | 2.768343  | -2.171010 | -1.849806 |
| H | 3.752340  | -0.727302 | -1.938358 |
| H | 4.373180  | -2.161343 | -1.047848 |
| C | 2.151352  | 1.380586  | -0.064134 |
| O | 1.612123  | 2.213861  | -0.751616 |
| C | 3.233719  | 1.701683  | 0.928218  |
| H | 3.105922  | 1.149222  | 1.862753  |
| H | 4.206055  | 1.407035  | 0.513413  |
| H | 3.240087  | 2.777771  | 1.109346  |
| C | -0.870457 | -0.178672 | -0.052227 |
| C | -1.829601 | 1.090814  | -0.066110 |
| C | -2.114770 | -1.135631 | 0.117926  |
| C | -2.996442 | 0.101716  | -0.066569 |
| C | -1.767416 | 1.943247  | 1.197210  |
| H | -1.805953 | 1.349830  | 2.115712  |
| H | -0.841103 | 2.526820  | 1.210373  |
| H | -2.617288 | 2.633646  | 1.201382  |
| C | -1.773485 | 1.974020  | -1.310118 |
| H | -1.890349 | 1.395057  | -2.229593 |
| H | -2.585733 | 2.706437  | -1.259604 |
| H | -0.816580 | 2.502421  | -1.358327 |
| C | -2.269642 | -1.722154 | 1.520898  |
| H | -3.269068 | -2.159491 | 1.613717  |

|   |           |           |           |
|---|-----------|-----------|-----------|
| H | -1.525726 | -2.506906 | 1.692461  |
| H | -2.160650 | -0.971547 | 2.311024  |
| C | -2.290985 | -2.220448 | -0.936781 |
| H | -1.535027 | -3.004065 | -0.810374 |
| H | -3.280215 | -2.675022 | -0.820453 |
| H | -2.208118 | -1.824014 | -1.951149 |
| O | -4.182161 | 0.240571  | -0.203135 |
| N | 0.984402  | -0.293195 | -1.418662 |
| N | -0.240840 | -0.332767 | -1.360002 |

-1238.165227 A.U.

TS for formation of thiadiazoline **10a** from reagents

|   |           |           |           |
|---|-----------|-----------|-----------|
| S | -0.305013 | 0.000002  | 1.366696  |
| C | -2.071441 | 0.000001  | -0.286401 |
| C | -2.762069 | 1.318326  | -0.000984 |
| O | -3.577422 | 1.387759  | 0.883399  |
| C | -2.351794 | 2.499376  | -0.843177 |
| H | -2.516044 | 2.305818  | -1.909131 |
| H | -2.937426 | 3.365216  | -0.531284 |
| H | -1.286523 | 2.714198  | -0.703309 |
| C | -2.762070 | -1.318324 | -0.000982 |
| O | -3.577415 | -1.387758 | 0.883408  |
| C | -2.351807 | -2.499371 | -0.843185 |
| H | -2.516067 | -2.305808 | -1.909137 |
| H | -1.286535 | -2.714197 | -0.703329 |
| H | -2.937439 | -3.365211 | -0.531289 |
| C | 0.994055  | 0.000000  | 0.323643  |
| C | 2.038325  | -1.128030 | 0.087963  |
| C | 2.038328  | 1.128028  | 0.087961  |
| C | 3.013405  | -0.000003 | -0.279716 |
| C | 2.425604  | -1.842265 | 1.387324  |
| H | 2.651368  | -1.141215 | 2.196015  |
| H | 1.596079  | -2.476370 | 1.718150  |
| H | 3.307151  | -2.469909 | 1.218694  |
| C | 1.824684  | -2.156766 | -1.016205 |
| H | 1.572575  | -1.698553 | -1.975620 |
| H | 2.746282  | -2.732493 | -1.152359 |

|   |           |           |           |
|---|-----------|-----------|-----------|
| H | 1.028691  | -2.857764 | -0.738370 |
| C | 2.425608  | 1.842265  | 1.387320  |
| H | 3.307157  | 2.469906  | 1.218689  |
| H | 1.596085  | 2.476373  | 1.718145  |
| H | 2.651370  | 1.141216  | 2.196013  |
| C | 1.824689  | 2.156762  | -1.016209 |
| H | 1.028699  | 2.857763  | -0.738377 |
| H | 2.746290  | 2.732486  | -1.152365 |
| H | 1.572579  | 1.698547  | -1.975624 |
| O | 4.121245  | -0.000004 | -0.746096 |
| N | -1.191809 | 0.000000  | -1.288925 |
| N | -0.077970 | 0.000000  | -1.597138 |

-1238.110114 A.U.

TS for decomposition of thiadiazoline **10a** to dinitrogen and thiocarbonyl ylide **6a**

|   |           |           |           |
|---|-----------|-----------|-----------|
| S | -0.420529 | -0.912346 | -0.869430 |
| C | -1.845154 | -0.118897 | -0.270216 |
| C | -2.965461 | -1.099196 | -0.215136 |
| O | -2.907872 | -2.126447 | -0.871879 |
| C | -4.137928 | -0.866897 | 0.712191  |
| H | -3.826046 | -0.462120 | 1.679200  |
| H | -4.863624 | -0.175764 | 0.271498  |
| H | -4.630973 | -1.830950 | 0.853289  |
| C | -1.980982 | 1.342004  | -0.351037 |
| O | -1.115576 | 2.025203  | -0.885433 |
| C | -3.183335 | 2.028801  | 0.256856  |
| H | -4.089443 | 1.819672  | -0.321958 |
| H | -3.362049 | 1.713739  | 1.288710  |
| H | -2.994932 | 3.103543  | 0.228996  |
| C | 0.900704  | -0.214664 | 0.004937  |
| C | 1.743853  | 1.093313  | -0.154359 |
| C | 2.178927  | -1.093581 | 0.119733  |
| C | 2.962085  | 0.222373  | 0.173028  |
| C | 1.814287  | 1.556362  | -1.618429 |
| H | 2.015166  | 0.733908  | -2.310632 |
| H | 0.865410  | 2.018517  | -1.892805 |
| H | 2.627318  | 2.283910  | -1.711000 |

|   |           |           |           |
|---|-----------|-----------|-----------|
| C | 1.531340  | 2.281049  | 0.772107  |
| H | 1.526561  | 1.987133  | 1.825381  |
| H | 2.359859  | 2.982140  | 0.628522  |
| H | 0.593921  | 2.787221  | 0.527845  |
| C | 2.499695  | -1.945386 | -1.114105 |
| H | 3.527388  | -2.312715 | -1.028722 |
| H | 1.827874  | -2.808830 | -1.165236 |
| H | 2.413521  | -1.387943 | -2.050468 |
| C | 2.294359  | -1.953897 | 1.377092  |
| H | 1.535371  | -2.743988 | 1.364613  |
| H | 3.283330  | -2.422261 | 1.397918  |
| H | 2.174541  | -1.368439 | 2.291326  |
| O | 4.106376  | 0.480947  | 0.428456  |
| N | -0.977210 | 0.075905  | 1.814583  |
| N | 0.149713  | -0.039498 | 1.686742  |

-1238.123840 A.U.

Thiocarbonyl ylide **6a**

|   |           |           |           |
|---|-----------|-----------|-----------|
| S | -0.418096 | -1.057951 | -0.536825 |
| C | -1.864912 | -0.169316 | -0.158028 |
| C | -2.801660 | -1.124724 | 0.389091  |
| O | -2.396057 | -2.258799 | 0.677077  |
| C | -4.262017 | -0.802471 | 0.615768  |
| H | -4.388680 | 0.022402  | 1.324166  |
| H | -4.769459 | -0.523096 | -0.312631 |
| H | -4.732079 | -1.698109 | 1.025764  |
| C | -1.991859 | 1.178380  | -0.664370 |
| O | -1.054117 | 1.766097  | -1.208788 |
| C | -3.320646 | 1.903863  | -0.547712 |
| H | -4.099133 | 1.422537  | -1.148381 |
| H | -3.678174 | 1.947448  | 0.485474  |
| H | -3.167565 | 2.918497  | -0.919839 |
| C | 0.934947  | -0.218430 | -0.202421 |
| C | 1.390579  | 0.910971  | 0.712313  |
| C | 2.341503  | -0.736403 | -0.494122 |
| C | 2.783774  | 0.260741  | 0.592988  |
| C | 1.429043  | 2.337930  | 0.146364  |

|   |           |           |           |
|---|-----------|-----------|-----------|
| H | 1.803597  | 2.367332  | -0.879573 |
| H | 0.432212  | 2.777924  | 0.141192  |
| H | 2.100429  | 2.925433  | 0.781510  |
| C | 0.769842  | 0.889245  | 2.107313  |
| H | 0.782709  | -0.113679 | 2.544921  |
| H | 1.337617  | 1.559167  | 2.760804  |
| H | -0.267555 | 1.233572  | 2.064312  |
| C | 2.859735  | -0.375936 | -1.892765 |
| H | 3.942937  | -0.531207 | -1.927504 |
| H | 2.386340  | -1.022315 | -2.639294 |
| H | 2.649572  | 0.662915  | -2.160691 |
| C | 2.615692  | -2.201224 | -0.165067 |
| H | 2.145989  | -2.858901 | -0.904290 |
| H | 3.695846  | -2.377825 | -0.180150 |
| H | 2.236512  | -2.471049 | 0.825170  |
| O | 3.821961  | 0.439005  | 1.165726  |

-1128.772659 A.U.

N<sub>2</sub> molecule

|   |          |          |           |
|---|----------|----------|-----------|
| N | 0.000000 | 0.000000 | 0.551300  |
| N | 0.000000 | 0.000000 | -0.551300 |

-109.413037 A.U.

Oxathiole **3e**

|   |           |           |           |
|---|-----------|-----------|-----------|
| S | -0.216169 | -1.537250 | -0.368578 |
| C | -1.523256 | -0.357050 | -0.155893 |
| C | -2.882843 | -0.841513 | -0.025753 |
| O | -3.174004 | -2.021947 | -0.040859 |
| C | -5.131875 | -0.303262 | 0.229331  |
| H | -5.735306 | 0.599595  | 0.329897  |
| H | -5.432286 | -0.866699 | -0.658519 |
| H | -5.253318 | -0.944071 | 1.107217  |
| O | -3.787247 | 0.146989  | 0.112443  |
| C | -1.038254 | 0.903867  | -0.260390 |
| O | 0.292537  | 1.035554  | -0.409204 |
| O | -1.740692 | 2.021476  | -0.282282 |
| C | -1.039179 | 3.259889  | -0.211017 |
| H | -1.815218 | 4.024827  | -0.231761 |
| H | -0.467619 | 3.334661  | 0.718811  |
| H | -0.369482 | 3.383615  | -1.066115 |
| C | 0.997715  | -0.187742 | -0.137771 |
| C | 1.803112  | -0.087173 | 1.219168  |
| C | 2.328580  | -0.252434 | -0.960513 |
| C | 3.063649  | 0.028826  | 0.354837  |

|   |          |           |           |
|---|----------|-----------|-----------|
| C | 1.526914 | 1.136168  | 2.083491  |
| H | 1.576010 | 2.065510  | 1.509824  |
| H | 0.537020 | 1.063418  | 2.548419  |
| H | 2.277091 | 1.192329  | 2.878737  |
| C | 1.798242 | -1.357190 | 2.066562  |
| H | 1.995700 | -2.259409 | 1.480544  |
| H | 2.571654 | -1.278151 | 2.837495  |
| H | 0.824132 | -1.486428 | 2.549242  |
| C | 2.507506 | 0.812044  | -2.034406 |
| H | 3.538486 | 0.781215  | -2.400624 |
| H | 1.832351 | 0.623143  | -2.875983 |
| H | 2.310414 | 1.818298  | -1.656110 |
| C | 2.660077 | -1.637657 | -1.516443 |
| H | 2.007219 | -1.871523 | -2.363682 |
| H | 3.700132 | -1.649067 | -1.857405 |
| H | 2.545209 | -2.432880 | -0.772457 |
| O | 4.208680 | 0.292549  | 0.608963  |

-1279.095193 A.U.

TS<sup>1</sup>

|   |           |           |           |
|---|-----------|-----------|-----------|
| S | -0.048344 | -1.175078 | -0.973880 |
| C | -1.359548 | -0.285009 | -0.251058 |
| C | -2.594207 | -1.020163 | -0.108903 |
| O | -2.687882 | -2.215925 | -0.343249 |
| C | -4.852397 | -0.996858 | 0.446090  |
| H | -5.587617 | -0.268498 | 0.791137  |
| H | -5.157281 | -1.419513 | -0.515550 |
| H | -4.755262 | -1.812402 | 1.168575  |
| O | -3.632457 | -0.277783 | 0.323320  |
| C | -1.091591 | 1.112028  | -0.309918 |
| O | 0.061841  | 1.577879  | -0.478286 |
| O | -2.139428 | 1.933134  | -0.222055 |
| C | -1.841237 | 3.324242  | -0.258240 |
| H | -2.793783 | 3.826794  | -0.087398 |
| H | -1.123295 | 3.591375  | 0.522552  |
| H | -1.431820 | 3.610579  | -1.230700 |
| C | 1.172292  | -0.271839 | -0.264681 |
| C | 1.572458  | -0.109200 | 1.217684  |
| C | 2.596461  | -0.192820 | -0.788600 |
| C | 3.019130  | -0.156289 | 0.689759  |
| C | 1.267256  | 1.169392  | 1.993143  |
| H | 1.485245  | 2.068813  | 1.416078  |
| H | 0.213276  | 1.191660  | 2.286041  |
| H | 1.884496  | 1.170264  | 2.897884  |
| C | 1.200600  | -1.340151 | 2.050813  |
| H | 1.490294  | -2.274353 | 1.560718  |
| H | 1.710937  | -1.286168 | 3.017508  |
| H | 0.119063  | -1.361240 | 2.216588  |
| C | 2.910910  | 1.124696  | -1.510280 |
| H | 3.993602  | 1.203405  | -1.651258 |
| H | 2.417532  | 1.132496  | -2.487224 |



|   |          |           |           |
|---|----------|-----------|-----------|
| H | 2.557940 | 1.992503  | -0.949644 |
| C | 3.092580 | -1.392413 | -1.591220 |
| H | 2.621085 | -1.417648 | -2.579736 |
| H | 4.175401 | -1.310271 | -1.727518 |
| H | 2.884368 | -2.339652 | -1.083533 |
| O | 4.087062 | -0.178628 | 1.236522  |

-1279.057407 A.U.

Thiocarbonyl ylide **6'e**

|   |           |           |           |
|---|-----------|-----------|-----------|
| S | 0.028284  | -1.062296 | 0.097500  |
| C | 1.513166  | -0.230301 | 0.024453  |
| C | 2.582991  | -1.232181 | -0.046472 |
| O | 2.372273  | -2.433480 | -0.107015 |
| C | 4.857025  | -1.693846 | -0.098476 |
| H | 5.787998  | -1.126022 | -0.088447 |
| H | 4.812232  | -2.371308 | 0.758688  |
| H | 4.778009  | -2.284523 | -1.015239 |
| O | 3.820864  | -0.720583 | -0.030651 |
| C | 1.614590  | 1.210286  | 0.093950  |
| O | 0.654166  | 1.953843  | 0.240690  |
| O | 2.864190  | 1.685532  | -0.018732 |
| C | 2.968236  | 3.100942  | 0.063317  |
| H | 4.032392  | 3.318666  | -0.033143 |
| H | 2.406536  | 3.582582  | -0.742311 |
| H | 2.589315  | 3.467297  | 1.021594  |
| C | -1.398748 | -0.277430 | 0.053841  |
| C | -2.140172 | 1.049628  | -0.105326 |
| C | -2.679179 | -1.133763 | 0.086787  |
| C | -3.413639 | 0.189745  | -0.167904 |
| C | -2.175642 | 1.958701  | 1.130913  |
| H | -2.361481 | 1.389285  | 2.047712  |
| H | -1.226064 | 2.484246  | 1.229174  |
| H | -2.993408 | 2.676815  | 1.006297  |
| C | -1.885028 | 1.837700  | -1.389589 |
| H | -1.835654 | 1.179092  | -2.263356 |
| H | -2.713266 | 2.538830  | -1.539451 |
| H | -0.946308 | 2.387633  | -1.305408 |
| C | -3.006041 | -1.761690 | 1.444040  |
| H | -4.041606 | -2.117440 | 1.443547  |
| H | -2.343450 | -2.613175 | 1.634237  |
| H | -2.888547 | -1.047040 | 2.264436  |
| C | -2.838922 | -2.146546 | -1.046522 |
| H | -2.183574 | -3.009560 | -0.886319 |
| H | -3.875878 | -2.496396 | -1.078517 |
| H | -2.595129 | -1.706551 | -2.018630 |
| O | -4.567303 | 0.454293  | -0.365909 |

-1279.071049 A.U.

TS<sup>2</sup>

|   |          |           |           |
|---|----------|-----------|-----------|
| S | 0.193782 | -0.247690 | -1.830577 |
|---|----------|-----------|-----------|

|   |           |           |           |
|---|-----------|-----------|-----------|
| C | -1.081462 | 0.114083  | -0.697938 |
| C | -2.062228 | -0.962759 | -0.519780 |
| O | -1.957100 | -2.050284 | -1.064102 |
| C | -4.052922 | -1.703051 | 0.425647  |
| H | -4.800141 | -1.317788 | 1.120154  |
| H | -4.511787 | -1.936180 | -0.539085 |
| H | -3.592354 | -2.612599 | 0.821470  |
| O | -3.089498 | -0.663802 | 0.290638  |
| C | -1.159811 | 1.518213  | -0.261757 |
| O | -0.447186 | 2.419869  | -0.666030 |
| O | -2.130703 | 1.728705  | 0.644060  |
| C | -2.286189 | 3.086999  | 1.036585  |
| H | -3.122600 | 3.093521  | 1.736401  |
| H | -1.379392 | 3.459683  | 1.521871  |
| H | -2.503952 | 3.721057  | 0.172905  |
| C | 1.147861  | -0.181772 | -0.441738 |
| C | 1.243305  | -1.094897 | 0.785908  |
| C | 2.495990  | 0.480885  | -0.234349 |
| C | 2.691199  | -0.567537 | 0.876575  |
| C | 0.429483  | -0.715867 | 2.025678  |
| H | 0.473306  | 0.356749  | 2.236042  |
| H | -0.621129 | -0.986315 | 1.885219  |
| H | 0.826059  | -1.253529 | 2.893569  |
| C | 1.124387  | -2.585849 | 0.472867  |
| H | 1.766945  | -2.874207 | -0.365135 |
| H | 1.424454  | -3.167387 | 1.350735  |
| H | 0.091778  | -2.830453 | 0.206170  |
| C | 2.458129  | 1.914892  | 0.311859  |
| H | 3.473222  | 2.203439  | 0.603195  |
| H | 2.080665  | 2.594797  | -0.455384 |
| H | 1.806394  | 2.010783  | 1.184266  |
| C | 3.441914  | 0.375203  | -1.427957 |
| H | 3.109518  | 1.037064  | -2.235278 |
| H | 4.447927  | 0.680167  | -1.122384 |
| H | 3.500386  | -0.646939 | -1.816304 |
| O | 3.636019  | -0.889498 | 1.543084  |

-1279.046885 A.U.

**Thiirane 8e'**

|   |           |           |           |
|---|-----------|-----------|-----------|
| S | -0.092827 | -0.466661 | 1.966492  |
| C | 0.720640  | -0.057051 | 0.401043  |
| C | 1.619903  | -1.187121 | -0.048851 |
| O | 1.269691  | -2.243056 | -0.515852 |
| C | 3.839633  | -1.902924 | -0.079435 |
| H | 4.809917  | -1.497875 | 0.206798  |
| H | 3.618260  | -2.810697 | 0.487472  |
| H | 3.818689  | -2.135000 | -1.147241 |
| O | 2.892076  | -0.881026 | 0.227822  |
| C | 1.313945  | 1.331786  | 0.261630  |
| O | 1.278979  | 2.209107  | 1.085010  |
| O | 1.840787  | 1.462255  | -0.963410 |

|   |           |           |           |
|---|-----------|-----------|-----------|
| C | 2.431259  | 2.733637  | -1.232085 |
| H | 2.852986  | 2.656107  | -2.233957 |
| H | 1.674974  | 3.522385  | -1.194793 |
| H | 3.211593  | 2.953728  | -0.499546 |
| C | -0.768157 | -0.171398 | 0.305969  |
| C | -1.663825 | -1.188993 | -0.465285 |
| C | -1.787639 | 0.995524  | 0.087652  |
| C | -2.729153 | -0.088226 | -0.451300 |
| C | -1.261961 | -1.458419 | -1.922655 |
| H | -0.887515 | -0.561814 | -2.426994 |
| H | -0.486048 | -2.223610 | -1.965660 |
| H | -2.146971 | -1.804743 | -2.467549 |
| C | -2.031048 | -2.479642 | 0.245657  |
| H | -2.375865 | -2.295255 | 1.267809  |
| H | -2.835162 | -2.983043 | -0.301137 |
| H | -1.159655 | -3.139691 | 0.287927  |
| C | -1.425789 | 2.021444  | -0.991639 |
| H | -2.347082 | 2.480567  | -1.365856 |
| H | -0.800790 | 2.814898  | -0.569019 |
| H | -0.896833 | 1.577639  | -1.839721 |
| C | -2.311222 | 1.700734  | 1.331183  |
| H | -1.521683 | 2.312431  | 1.778966  |
| H | -3.152351 | 2.344901  | 1.054313  |
| H | -2.661722 | 0.989866  | 2.085460  |
| O | -3.895163 | -0.076071 | -0.742627 |

-1279.113489 A.U.

#### Alkene 5e

|   |           |           |           |
|---|-----------|-----------|-----------|
| C | 0.645379  | 0.000102  | 0.000123  |
| C | 1.407702  | -1.279760 | -0.076616 |
| O | 1.061203  | -2.285262 | -0.657240 |
| C | 3.320696  | -2.397030 | 0.653377  |
| H | 4.189641  | -2.170102 | 1.271080  |
| H | 2.758110  | -3.234325 | 1.075040  |
| H | 3.628403  | -2.655002 | -0.363386 |
| O | 2.530937  | -1.211184 | 0.652101  |
| C | 1.407827  | 1.279892  | 0.076665  |
| O | 1.061319  | 2.285656  | 0.656826  |
| O | 2.531100  | 1.211023  | -0.651986 |
| C | 3.320950  | 2.396811  | -0.653586 |
| H | 4.190056  | 2.169543  | -1.270936 |
| H | 2.758547  | 3.233952  | -1.075805 |
| H | 3.628378  | 2.655243  | 0.363144  |
| C | -0.699708 | 0.000069  | 0.000114  |
| C | -1.745164 | -1.104231 | -0.184694 |
| C | -1.745343 | 1.104247  | 0.184906  |
| C | -2.796109 | -0.000030 | -0.000233 |
| C | -1.824693 | -1.652589 | -1.616797 |
| H | -1.799664 | -0.848797 | -2.360847 |
| H | -0.983472 | -2.322961 | -1.801682 |
| H | -2.769999 | -2.192861 | -1.735012 |

|   |           |           |           |
|---|-----------|-----------|-----------|
| C | -1.789924 | -2.226108 | 0.848710  |
| H | -1.700374 | -1.840930 | 1.869951  |
| H | -2.748329 | -2.749617 | 0.766214  |
| H | -0.982038 | -2.940819 | 0.670379  |
| C | -1.789737 | 2.226174  | -0.848496 |
| H | -2.748011 | 2.749942  | -0.766118 |
| H | -0.981701 | 2.940680  | -0.670003 |
| H | -1.700133 | 1.841023  | -1.869740 |
| C | -1.825590 | 1.652499  | 1.616974  |
| H | -0.984680 | 2.323133  | 1.802288  |
| H | -2.771134 | 2.192432  | 1.734841  |
| H | -1.800604 | 0.848655  | 2.360971  |
| O | -3.997148 | -0.000168 | -0.000085 |

-881.081648 A.U.

Orthorombic sulfur

|   |           |           |           |
|---|-----------|-----------|-----------|
| S | 0.001513  | 2.394767  | 0.077733  |
| S | 1.727571  | 1.429384  | -0.560161 |
| S | 2.152693  | 0.061002  | 0.919657  |
| S | 1.726255  | -1.852610 | 0.099068  |
| S | -0.000960 | -1.676668 | -0.994917 |
| S | -1.728584 | -1.850568 | 0.098746  |
| S | -2.152513 | 0.063070  | 0.919695  |
| S | -1.725974 | 1.431621  | -0.559820 |

-3184.339450 A.U.
